# Supplementary material for: Improving Balance and Movement Control in Fencing Using IoT and Real-Time Sensorial Feedback
Source: MDPI journal article supplement (doi:10.3390/s23249801), 2023-12-13
Supplement: s1 [file s1]

**Table S1.** Week 0 measurements of the control group

| Subject        | Total movement time | Unbalance time [%] | Unbalance time [%] |
|----------------|---------------------|--------------------|--------------------|
|                | [s]                 | 2/3 axis           | 3/3 axis           |
| CG1            | 11.04               | 41.17              | 24.51              |
| CG2            | 11.9                | 42.61              | 17.39              |
| CG3            | 10.1                | 23.47              | 13.26              |
| CG4            | 8.14                | 18.99              | 7.59               |
| CG5            | 11.03               | 50.47              | 23.36              |
| CG6            | 9.89                | 29.16              | 12.5               |
| CG7            | 8.39                | 49.38              | 28.39              |
| CG8            | 9.84                | 38.94              | 17.89              |
| CG9            | 9.89                | 31.25              | 10.41              |
| CG10           | 9.3                 | 18.22              | 16.22              |
| <b>Average</b> | <b>9.952</b>        | <b>34.366</b>      | <b>17.152</b>      |

**Table S2.** Week 0 measurements of the test group with visual feedback

| Subject        | Total movement time | Unbalance time [%] | Unbalance time [%] |
|----------------|---------------------|--------------------|--------------------|
|                | [s]                 | 2/3 axis           | 3/3 axis           |
| VG1            | 10.24               | 31.37              | 12.23              |
| VG2            | 10.17               | 37.61              | 18.26              |
| VG3            | 12.17               | 18.92              | 9.11               |
| VG4            | 9.42                | 42.83              | 24.22              |
| VG5            | 10.21               | 46.37              | 20.22              |
| VG6            | 10.49               | 27.46              | 15.89              |
| VG7            | 11.31               | 28.78              | 12.33              |
| VG8            | 10.63               | 39.24              | 27.37              |
| VG9            | 11.09               | 35.15              | 18.29              |
| VG10           | 10.88               | 22.32              | 13.49              |
| <b>Average</b> | <b>10.661</b>       | <b>33.005</b>      | <b>17.141</b>      |

**Table S3.** Week 0 measurements of the test group with haptic feedback

| Subject        | Total movement time | Unbalance time [%] | Unbalance time [%] |
|----------------|---------------------|--------------------|--------------------|
|                | [s]                 | 2/3 axis           | 3/3 axis           |
| HG1            | 13.25               | 29.92              | 14.91              |
| HG2            | 13.64               | 22.17              | 12.42              |
| HG3            | 10.08               | 34.35              | 18.22              |
| HG4            | 11.77               | 19.84              | 7.45               |
| HG5            | 9.08                | 43.57              | 27.31              |
| HG6            | 10.95               | 26.22              | 15.22              |
| HG7            | 12.56               | 37.91              | 21.71              |
| HG8            | 9.94                | 25.93              | 14.21              |
| HG9            | 8.05                | 39.32              | 19.22              |
| HG10           | 10.01               | 31.05              | 15.13              |
| <b>Average</b> | <b>10.933</b>       | <b>31.028</b>      | <b>16.58</b>       |

**Table S4.** Week 5 measurements of the control group

| Subject        | Total movement time | Unbalance time [%] | Unbalance time [%] |
|----------------|---------------------|--------------------|--------------------|
|                | [s]                 | 2/3 axis           | 3/3 axis           |
| CG1            | 10.54               | 39.28              | 27.42              |
| CG2            | 10.99               | 36.97              | 16.19              |
| CG3            | 10.31               | 25.14              | 12.99              |
| CG4            | 9.42                | 16.88              | 8.72               |
| CG5            | 10.62               | 45.12              | 21.09              |
| CG6            | 9.61                | 33.67              | 11.75              |
| CG7            | 8.75                | 53.51              | 31.24              |
| CG8            | 10.21               | 32.74              | 14.58              |
| CG9            | 9.41                | 27.82              | 9.86               |
| CG10           | 9.42                | 16.62              | 15.21              |
| <b>Average</b> |                     | <b>32.775</b>      | <b>16.905</b>      |

**Table S5.** Week 5 measurements of the test group with visual feedback

| Subject        | Total movement time | Unbalance time [%] | Unbalance time [%] |
|----------------|---------------------|--------------------|--------------------|
|                | [s]                 | 2/3 axis           | 3/3 axis           |
| VG1            | 10.54               | 25.87              | 13.45              |
| VG2            | 10.26               | 40.31              | 14.78              |
| VG3            | 12.02               | 18.82              | 7.75               |
| VG4            | 11.88               | 31.43              | 16.37              |
| VG5            | 10.37               | 34.18              | 14.35              |
| VG6            | 10.31               | 22.26              | 18.92              |
| VG7            | 11.47               | 26.12              | 10.46              |
| VG8            | 10.96               | 30.89              | 17.87              |
| VG9            | 11.14               | 26.91              | 13.93              |
| VG10           | 10.56               | 22.12              | 10.79              |
| <b>Average</b> | <b>10.951</b>       | <b>27.891</b>      | <b>13.867</b>      |

**Table S6.** Week 5 measurements of the test group with haptic feedback

| Subject        | Total movement time | Unbalance time [%] | Unbalance time [%] |
|----------------|---------------------|--------------------|--------------------|
|                | [s]                 | 2/3 axis           | 3/3 axis           |
| HG1            | 12.87               | 27.41              | 12.83              |
| HG2            | 12.96               | 23.66              | 15.74              |
| HG3            | 9.96                | 33.95              | 16.86              |
| HG4            | 10.78               | 21.74              | 10.21              |
| HG5            | 9.39                | 36.37              | 20.41              |
| HG6            | 11.06               | 22.68              | 17.89              |
| HG7            | 12.24               | 35.41              | 18.41              |
| HG8            | 10.27               | 27.18              | 14.61              |
| HG9            | 9.37                | 36.91              | 16.38              |
| HG10           | 10.58               | 32.85              | 14.32              |
| <b>Average</b> | <b>10.948</b>       | <b>29.816</b>      | <b>15.766</b>      |

**Table S7.** The Wilcoxon test was applied to the control group based on unbalanced time on 2 out of 3 axes.

| Subject | W0 - 2/3 | W5 - 2/3 | Diff. | Sign | Abs. diff. | Rank | Rank with sign |                                    |      |
|---------|----------|----------|-------|------|------------|------|----------------|------------------------------------|------|
| CG1     | 41.17    | 39.28    | 1.89  | 1    | 1.89       | 3    | 3              | The sum of ranks of negative diff. | 15   |
| CG2     | 42.61    | 36.97    | 5.64  | 1    | 5.64       | 9    | 9              | The sum of ranks of negative diff. | 37   |
| CG3     | 23.47    | 25.14    | -1.67 | -1   | 1.67       | 2    | -2             |                                    |      |
| CG4     | 18.99    | 16.88    | 2.11  | 1    | 2.11       | 4    | 4              | Wilcoxon test result               | 15   |
| CG5     | 50.47    | 45.12    | 5.35  | 1    | 5.35       | 8    | 8              | Critical value                     | 8    |
| CG6     | 29.16    | 33.67    | -4.51 | -1   | 4.51       | 7    | -7             | Significance level                 | 0.05 |
| CG7     | 49.38    | 53.51    | -4.13 | -1   | 4.13       | 6    | -6             |                                    |      |
| CG8     | 38.94    | 32.74    | 6.2   | 1    | 6.2        | 10   | 10             |                                    |      |
| CG9     | 31.25    | 27.82    | 3.43  | 1    | 3.43       | 5    | 5              |                                    |      |
| CG10    | 18.22    | 16.62    | 1.6   | 1    | 1.6        | 1    | 1              |                                    |      |

**Table S8.** The Wilcoxon test was applied to the control group based on unbalanced time on 3 out of 3 axes.

| Subject | W0 - 3/3 | W5 - 3/3 | Diff. | Sign | Abs. diff. | Rank | Rank with sign |                                    |      |
|---------|----------|----------|-------|------|------------|------|----------------|------------------------------------|------|
| CG1     | 24.51    | 27.42    | -2.91 | -1   | 2.91       | 9    | -9             | The sum of ranks of negative diff. | 22   |
| CG2     | 17.39    | 16.19    | 1.2   | 1    | 1.2        | 6    | 6              | The sum of ranks of negative diff. | 33   |
| CG3     | 13.26    | 12.99    | 0.27  | 1    | 0.27       | 1    | 1              |                                    |      |
| CG4     | 7.59     | 8.72     | -1.13 | -1   | 1.13       | 5    | -5             | Wilcoxon test result               | 22   |
| CG5     | 23.36    | 21.09    | 2.27  | 1    | 2.27       | 7    | 7              | Critical value                     | 8    |
| CG6     | 12.5     | 11.75    | 0.75  | 1    | 0.75       | 3    | 3              | Significance level                 | 0.05 |
| CG7     | 28.39    | 31.24    | -2.85 | -1   | 2.85       | 8    | -8             |                                    |      |
| CG8     | 17.89    | 14.58    | 3.31  | 1    | 3.31       | 10   | 10             |                                    |      |
| CG9     | 10.41    | 9.86     | 0.55  | 1    | 0.55       | 2    | 2              |                                    |      |
| CG10    | 16.22    | 15.21    | 1.01  | 1    | 1.01       | 4    | 4              |                                    |      |

**Table S9.** The Wilcoxon test was applied to the group training with visual feedback based on unbalanced time on 2 out of 3 axes.

| Subject | W0 - 2/3 | W5 - 2/3 | Diff. | Sign | Abs. diff. | Rank | Rank with sign |                                    |      |
|---------|----------|----------|-------|------|------------|------|----------------|------------------------------------|------|
| VG1     | 31.37    | 25.87    | 5.5   | 1    | 5.5        | 6    | 6              | The sum of ranks of negative diff. | 4    |
| VG2     | 37.61    | 40.31    | -2.7  | -1   | 2.7        | 4    | -4             | The sum of ranks of negative diff. | 45   |
| VG3     | 18.92    | 18.82    | 0.1   | 1    | 0.1        | 1    | 1              |                                    |      |
| VG4     | 42.83    | 31.43    | 11.4  | 1    | 11.4       | 9    | 9              | Wilcoxon test result               | 4    |
| VG5     | 46.37    | 34.18    | 12.19 | 1    | 12.19      | 10   | 10             | Critical value                     | 8    |
| VG6     | 27.46    | 22.26    | 5.2   | 1    | 5.2        | 5    | 5              | Significance level                 | 0.05 |
| VG7     | 28.78    | 26.12    | 2.66  | 1    | 2.66       | 3    | 3              |                                    |      |
| VG8     | 39.24    | 30.89    | 8.35  | 1    | 8.35       | 8    | 8              |                                    |      |
| VG9     | 35.15    | 26.91    | 8.24  | 1    | 8.24       | 7    | 7              |                                    |      |
| VG10    | 22.32    | 22.12    | 0.2   | 1    | 0.2        | 2    | 2              |                                    |      |

**Table S10.** The Wilcoxon test was applied to the group training with visual feedback based on unbalanced time on 3 out of 3 axes.

| Subject | W0 - 3/3 | W5 - 3/3 | Diff. | Sign | Abs. diff. | Rank | Rank with sign |                                    |      |
|---------|----------|----------|-------|------|------------|------|----------------|------------------------------------|------|
| VG1     | 13.45    | 12.23    | 1.22  | 1    | 1.22       | 2    | 2              | The sum of ranks of negative diff. | 47   |
| VG2     | 14.78    | 18.26    | -3.48 | -1   | 3.48       | 6    | -6             | The sum of ranks of negative diff. | 6    |
| VG3     | 7.75     | 9.11     | -1.36 | -1   | 1.36       | 3    | -3             |                                    |      |
| VG4     | 16.37    | 24.22    | -7.85 | -1   | 7.85       | 9    | -9             | Wilcoxon test result               | 6    |
| VG5     | 14.35    | 20.22    | -5.87 | -1   | 5.87       | 8    | -8             | Critical value                     | 8    |
| VG6     | 18.92    | 15.89    | 3.03  | 1    | 3.03       | 5    | 5              | Significance level                 | 0.05 |
| VG7     | 10.46    | 10.33    | 0.13  | 1    | 0.13       | 1    | 1              |                                    |      |
| VG8     | 17.87    | 27.37    | -9.5  | -1   | 9.5        | 10   | -10            |                                    |      |
| VG9     | 13.93    | 18.29    | -4.36 | -1   | 4.36       | 7    | -7             |                                    |      |
| VG10    | 10.79    | 13.49    | -2.7  | -1   | 2.7        | 4    | -4             |                                    |      |

**Table S11.** The Wilcoxon test was applied to the group training with visual feedback based on unbalanced time on 2 out of 3 axes.

| Subject | W0 - 2/3 | W5 - 2/3 | Diff. | Sign | Abs. diff. | Rank | Rank with sign |                                    |      |
|---------|----------|----------|-------|------|------------|------|----------------|------------------------------------|------|
| HG1     | 29.92    | 27.41    | 2.51  | 1    | 2.51       | 8    | 8              | The sum of ranks of negative diff. | 14   |
| HG2     | 22.17    | 23.66    | -1.49 | -1   | 1.49       | 3    | -3             | The sum of ranks of negative diff. | 33   |
| HG3     | 34.35    | 33.95    | 0.4   | 1    | 0.4        | 1    | 1              |                                    |      |
| HG4     | 19.84    | 21.74    | -1.9  | -1   | 1.9        | 5    | -5             | Wilcoxon test result               | 14   |
| HG5     | 43.57    | 36.37    | 7.2   | 1    | 7.2        | 10   | 10             | Critical value                     | 8    |
| HG6     | 26.22    | 22.68    | 3.54  | 1    | 3.54       | 9    | 9              | Significance level                 | 0.05 |
| HG7     | 37.91    | 35.41    | 2.5   | 1    | 2.5        | 7    | 7              |                                    |      |
| HG8     | 25.93    | 27.18    | -1.25 | -1   | 1.25       | 2    | -2             |                                    |      |
| HG9     | 39.32    | 36.91    | 2.41  | 1    | 2.41       | 6    | 6              |                                    |      |
| HG10    | 31.05    | 32.85    | -1.8  | -1   | 1.8        | 4    | -4             |                                    |      |

**Table S12.** The Wilcoxon test was applied to the group training with visual feedback based on unbalanced time on 3 out of 3 axes.

| Subject | W0 - 3/3 | W5 - 3/3 | Diff. | Sign | Abs. diff. | Rank | Rank with sign |                                    |      |
|---------|----------|----------|-------|------|------------|------|----------------|------------------------------------|------|
| HG1     | 12.83    | 14.91    | -2.08 | -1   | 2.08       | 4    | -4             | The sum of ranks of negative diff. | 34   |
| HG2     | 15.74    | 12.42    | 3.32  | 1    | 3.32       | 9    | 9              | The sum of ranks of negative diff. | 21   |
| HG3     | 16.86    | 18.22    | -1.36 | -1   | 1.36       | 3    | -3             |                                    |      |
| HG4     | 10.21    | 7.45     | 2.76  | 1    | 2.76       | 6    | 6              | Wilcoxon test result               | 21   |
| HG5     | 20.41    | 27.31    | -6.9  | -1   | 6.9        | 10   | -10            | Critical value                     | 8    |
| HG6     | 17.89    | 15.22    | 2.67  | 1    | 2.67       | 5    | 5              | Significance level                 | 0.05 |
| HG7     | 18.41    | 21.71    | -3.3  | -1   | 3.3        | 8    | -8             |                                    |      |
| HG8     | 14.61    | 14.21    | 0.4   | 1    | 0.4        | 1    | 1              |                                    |      |
| HG9     | 16.38    | 19.22    | -2.84 | -1   | 2.84       | 7    | -7             |                                    |      |
| HG10    | 14.32    | 15.13    | -0.81 | -1   | 0.81       | 2    | -2             |                                    |      |
